# Supplementary material
Source: HighWire-hosted journal article supplement (https://bmjopen.bmj.com/content/9/1/e022673)
Supplement: inline-supplementary-material-3 [file inline-supplementary-material-3.pdf]

**Appendix 3: Subject headings<sup>1</sup>**

|              | Cochrane Library                                                                                     | Embase                                                                                                                                                                                                                                                                                                                      | Medline                                                                                                                                                                                             | PsychINFO                                                                                                                                                                                                               | SocINDEX                                                                                                                                                                                                 |
|--------------|------------------------------------------------------------------------------------------------------|-----------------------------------------------------------------------------------------------------------------------------------------------------------------------------------------------------------------------------------------------------------------------------------------------------------------------------|-----------------------------------------------------------------------------------------------------------------------------------------------------------------------------------------------------|-------------------------------------------------------------------------------------------------------------------------------------------------------------------------------------------------------------------------|----------------------------------------------------------------------------------------------------------------------------------------------------------------------------------------------------------|
| <b>P</b>     | Substance-Related Disorder                                                                           | Drug dependence<br>Alcoholism<br>Substance abuse                                                                                                                                                                                                                                                                            | Substance-Related Disorders                                                                                                                                                                         | Alcohol Abuse<br>Drug Dependency<br>Polydrug Abuse<br>Substance Use Disorder                                                                                                                                            | Substance abuse<br>Drug addiction<br>Alcoholism                                                                                                                                                          |
| <b>E (C)</b> | Residential Treatment                                                                                | Drug dependence treatment                                                                                                                                                                                                                                                                                                   | Inpatient Residential Treatment                                                                                                                                                                     | Residential Care Institution                                                                                                                                                                                            | Substance abuse treatment                                                                                                                                                                                |
| <b>O</b>     | Treatment Outcome<br><b>AND</b><br>Quality of Life<br>Value of Life<br>Mental health<br>Self Concept | Treatment outcome<br>Clinical outcome<br>Outcome assessment<br>Outcome research<br>Patient-reported outcome<br><b>AND</b><br>Social psychology<br>Stigma<br>Quality of life<br>Mental health<br>Self esteem<br>Self concept<br>Psychological well-being<br>Wellbeing<br>Social support<br>Social capital<br>Coping behavior | Treatment Outcome<br><b>AND</b><br>Quality of Life<br>Mental Health<br>Social capital<br>Social change<br>Social conditions<br>Social Environment<br>Value of life<br>Self Concept<br>Self Efficacy | Treatment Outcomes<br>Treatment Effectiveness Evaluation<br><b>AND</b><br>Psychosocial Factors<br>Quality of life<br>Well Being<br>Mental Health<br>Social Capital<br>Coping Behavior<br>Self-Efficacy<br>Self -Concept | Outcome assessment in psychotherapy<br><b>AND</b><br>Psychosocial factors<br>Quality of life<br>Mental health & social status<br>Social sustainability<br>Social adjustment<br>Self-esteem<br>Well-being |

<sup>1</sup> In this table the two databases *Campbell Collaboration Library*, *Epistemonikos*, *Google Scholar* and *Social Science Citation Index* are excluded because the publications are not indexed regarding to subject headings.

|    |                |                              |                |                                        |                 |
|----|----------------|------------------------------|----------------|----------------------------------------|-----------------|
| SD | Cohort Studies | Cohort Analysis<br>Follow up | Cohort Studies | Cohort Analysis<br>Followup<br>Studies | Cohort analysis |
|----|----------------|------------------------------|----------------|----------------------------------------|-----------------|
