# Supplementary material
Source: HighWire-hosted journal article supplement (https://bmjopen.bmj.com/content/9/1/e022673)
Supplement: inline-supplementary-material-4 [file inline-supplementary-material-4.pdf]

#### ***Appendix 4: Search for systematic reviews***

##### Search string used in Epistemonikos, January 23<sup>rd</sup>, 2018

(title:(("substance use disorder" OR "substance use" OR "substance abuse" OR "substance misuse" OR addiction OR dependency OR alcoholism)) OR abstract:(("substance use disorder" OR "substance use" OR "substance abuse" OR "substance misuse" OR addiction OR dependency OR alcoholism))) AND (title:((treatment OR therapy OR rehabilitation OR recovery) AND (inpatient OR residential OR hospitalized)) OR abstract:((treatment OR therapy OR rehabilitation OR recovery) AND (inpatient OR residential OR hospitalized))) AND (title:((prognosis OR prediction OR outcome OR effectiveness) AND ("psychosocial aspects" OR "quality of life" OR "mental health" OR "life quality" OR "value of life" OR "social well-being" OR "social behaviour" OR "social capital" OR "material capital" OR "interpersonal relationship" OR employment OR education OR anxiety OR depression OR mastery OR self-esteem OR stigma OR "social support"))) OR abstract:((prognosis OR prediction OR outcome OR effectiveness) AND ("psychosocial aspects" OR "quality of life" OR "mental health" OR "life quality" OR "value of life" OR "social well-being" OR "social behaviour" OR "social capital" OR "material capital" OR "interpersonal relationship" OR employment OR education OR anxiety OR depression OR mastery OR self-esteem OR stigma OR "social support"))))

When the search was narrowed to *Systematic Review*, it gave 13 hits of which 1 was assessed as relevant after screening of title and abstract.

##### Search string used in Campbell Collaboration January 24<sup>th</sup>, 2018

"substance use disorder OR substance use OR substance abuse OR substance misuse OR addiction OR dependency OR alcoholism" gave 3 results, and

(treatment OR therapy OR rehabilitation OR recovery) AND (inpatient OR residential OR hospitalized) gave 4 results. No of the results were considered as relevant after screening of title and abstract.

##### Search string used in Cochrane Library January 24<sup>th</sup>, 2018

| <i>ID</i> | <i>Search</i>                                                                                                                                                                                                                                            | <i>Hits</i> |
|-----------|----------------------------------------------------------------------------------------------------------------------------------------------------------------------------------------------------------------------------------------------------------|-------------|
| #1        | "substance use disorder" or "substance use" or "substance abuse" or "substance misuse" or addict* or dependency or alcoholism:ti (Word variations have been searched)                                                                                    | 3232        |
| #2        | narcotic* or drug* or alcohol or heroin* or opioid* or cannabis* or marihuana* or cocaine* or crack* or amphetamine* or methamphetamine* or hallucinogen* or morphine:ti,ab,kw (Word variations have been searched)                                      | 372580      |
| #3        | #1 and #2                                                                                                                                                                                                                                                | 1967        |
| #4        | treat* or therapy or rehab* or recove*:ti (Word variations have been searched)                                                                                                                                                                           | 270221      |
| #5        | inpatient or residential or hospitalized:ti,ab,kw (Word variations have been searched)                                                                                                                                                                   | 19914       |
| #6        | #4 and #5                                                                                                                                                                                                                                                | 5522        |
| #7        | "psychosocial aspects" or "quality of life" or "mental health" or "life quality" or "value of life" or "social well-being" or "social behaviour" or "social capital" or "material capital" or "interpersonal relationship" or employment or education or | 156538      |

anxiety or depression or mastery or self-esteem or stigma or "social support":ti,ab,kw (Word variations have been searched)

|     |                                                                                          |        |
|-----|------------------------------------------------------------------------------------------|--------|
| #8  | prognos* or predict* or outcome or effect*:ti,ab,kw (Word variations have been searched) | 752246 |
| #9  | #7 and #8                                                                                | 124649 |
| #10 | #3 and #6 and #9                                                                         | 39     |
| #11 | #3 and #6 and #9 in Cochrane Reviews (Reviews and Protocols) and Other Reviews           | 0      |
| #12 | #3 and #6 and #8 in Cochrane Reviews (Reviews and Protocols) and Other Reviews           | 1      |

39 trials and 1 Cochrane Reviews were found. The Cochrane Review was not considered as relevant after screening of title and abstract.
